# Supplementary material for: Tissue metabolites in diffuse glioma and their modulations by IDH1 mutation, histology, and treatment
Source: PubMed Central journal article supplement (PMC8855807; doi:10.1172/jci.insight.153526), 2022-02-08
Supplement: jciinsight-7-153526-s253.pdf [file jciinsight-7-153526-s253.pdf]

## **Supplementary information (Trautwein *et al.*)**

### **Content**

- 1 Supplementary figures S1-S5
- 2 Supplementary tables ST1-ST2

1 Supplementary Figures

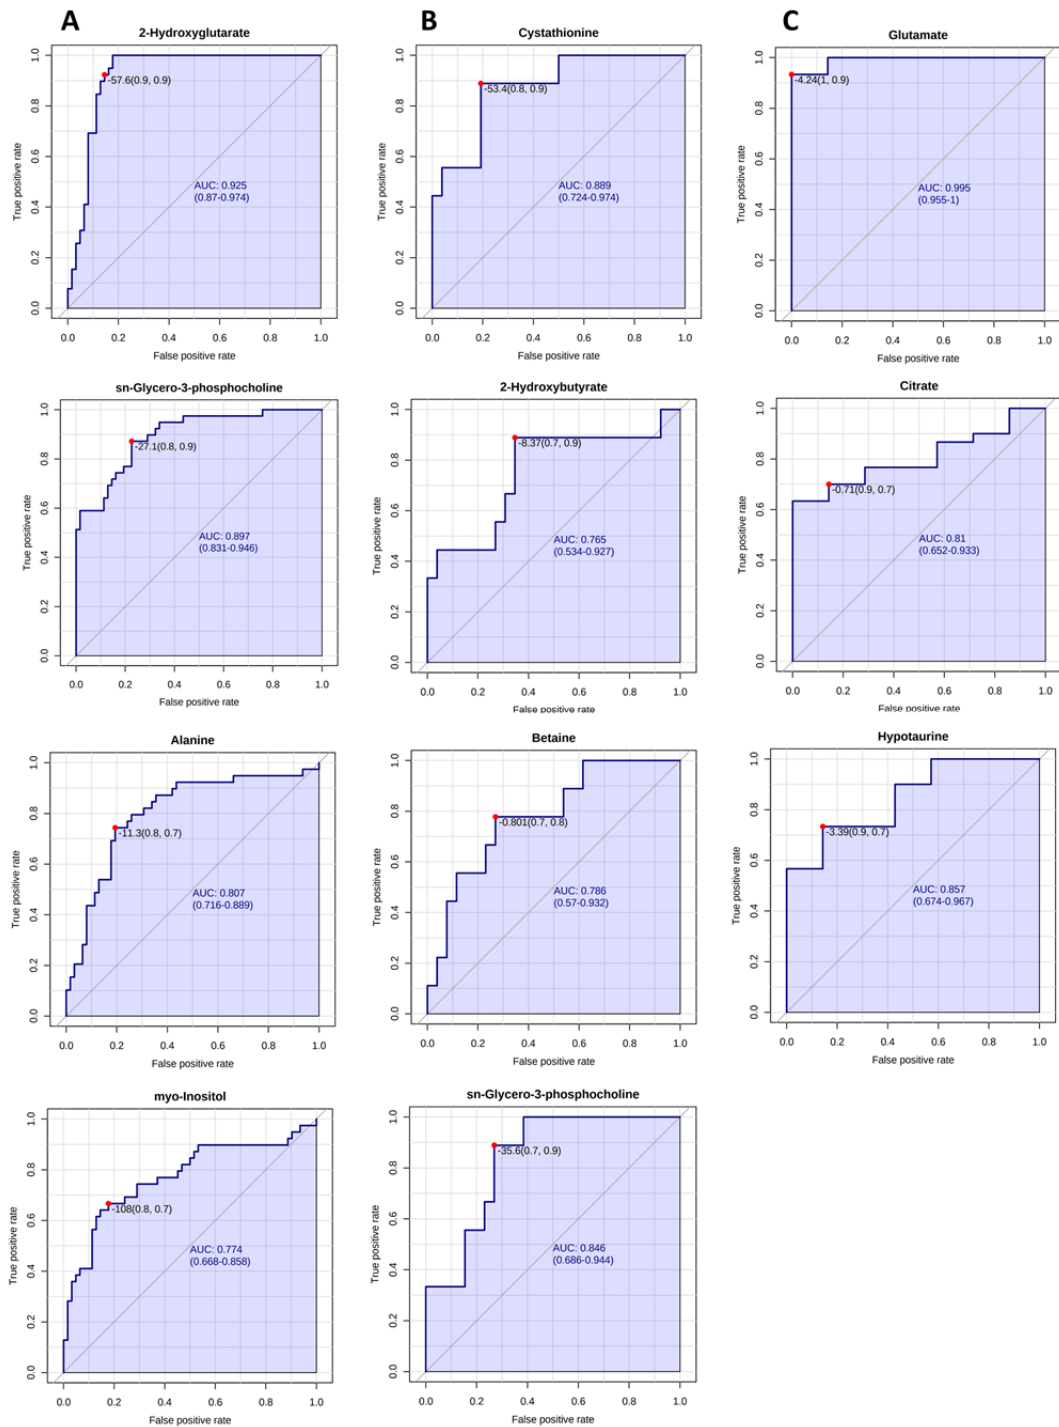

**Supplementary Figure S1: Receiver operating characteristic (ROC) analysis.**

Area under the curve (AUC) plots for *IDH1*-mutation (*IDH1*-mut, n = 62) vs. wildtype (*IDH1*-wt, n = 39) comparison I (A), astrocytoma (Astro) *IDH1*-mut (n = 26) vs. wt (n = 9) comparison II (B) and glioblastoma (GB) *IDH1*-mut (n = 7) vs. wt (n = 30) comparison III (C).

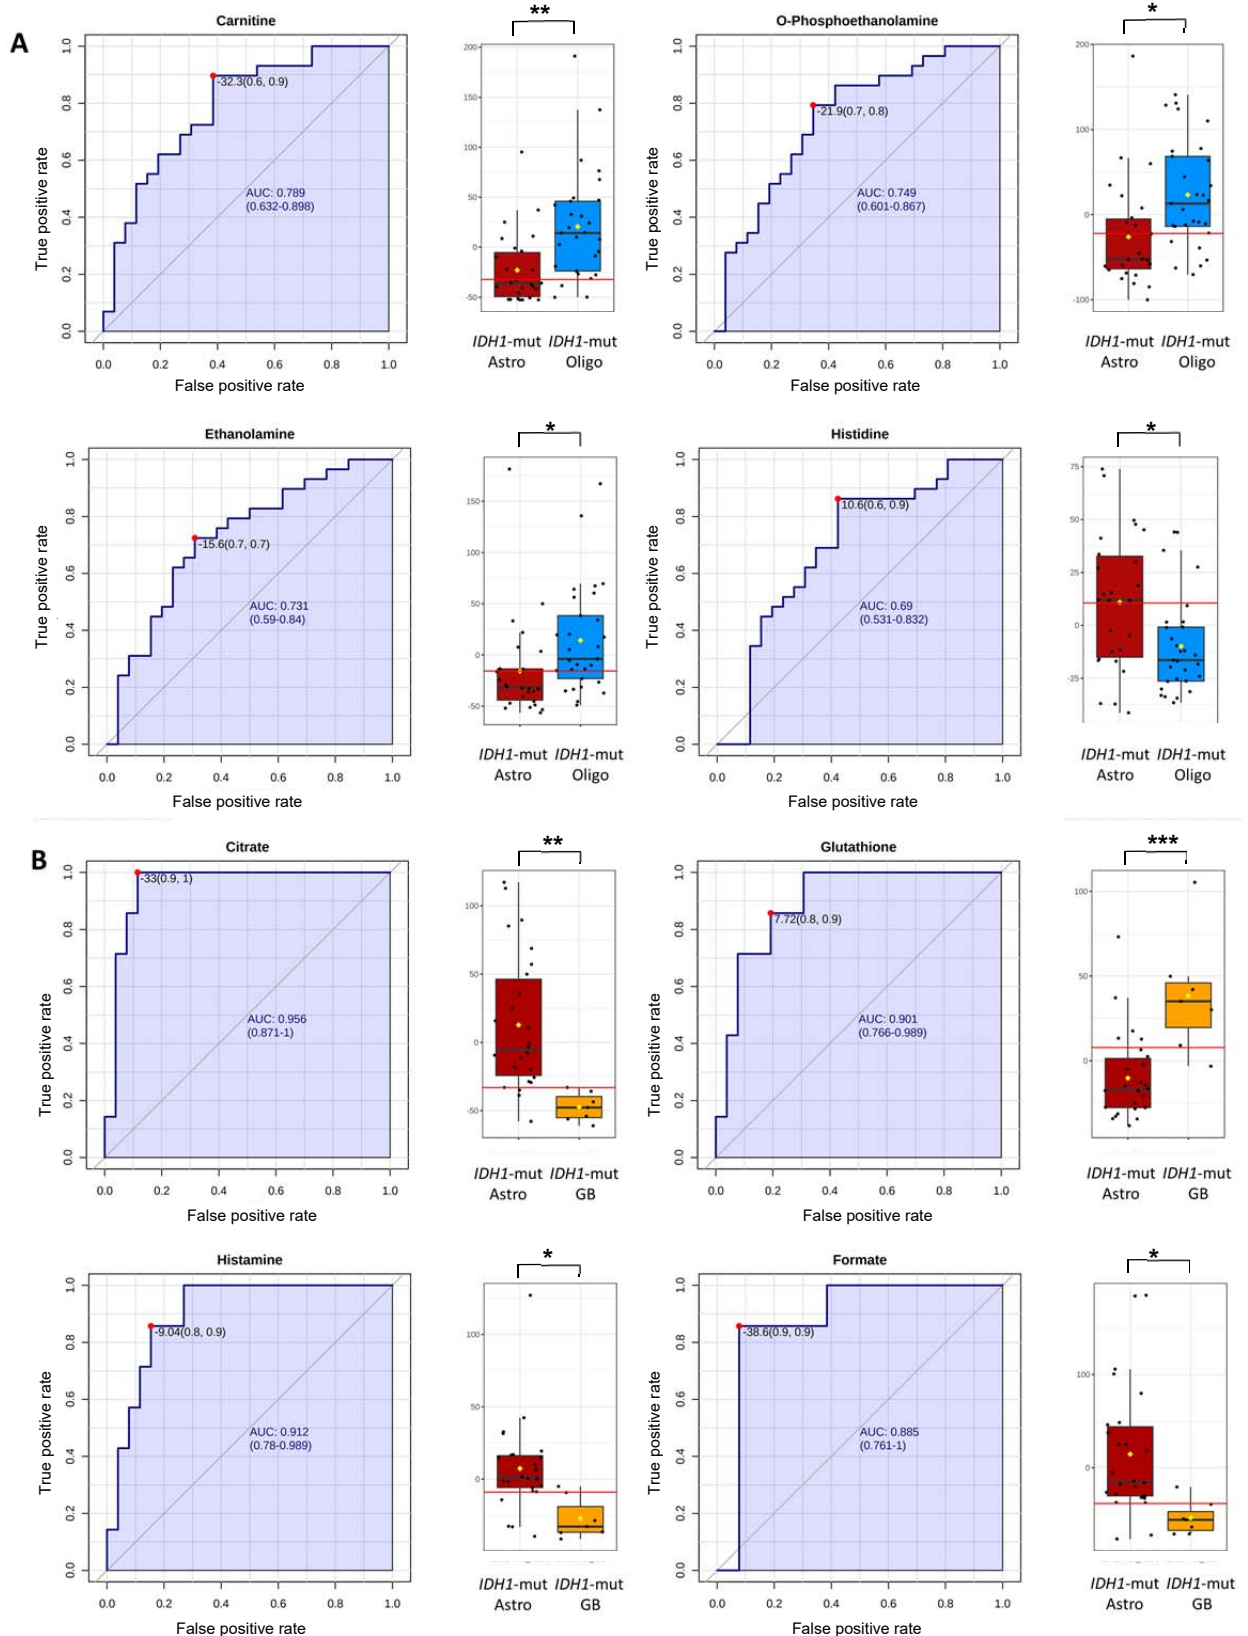

**Supplementary Figure S2: Comparisons of tumor entities by receiver operating characteristic (ROC) analysis and significant metabolites. (A) Astro IDH1-mut (n = 26) vs. Oligo IDH1-mut (n = 29) comparison IV, and (B) Astro IDH1-mut (n = 26) vs. GB IDH1-mut (n = 7) comparison V. p-values determined by student's t-tests. Illustrated as box and whiskers plots showing all points with mean, min/max and outliers. Abbreviations: Astro, astrocytoma; GB, glioblastoma; Oligo, oligodendroglioma. p-values: \*\*\* < 0.001, \*\* < 0.01, \* < 0.05.**

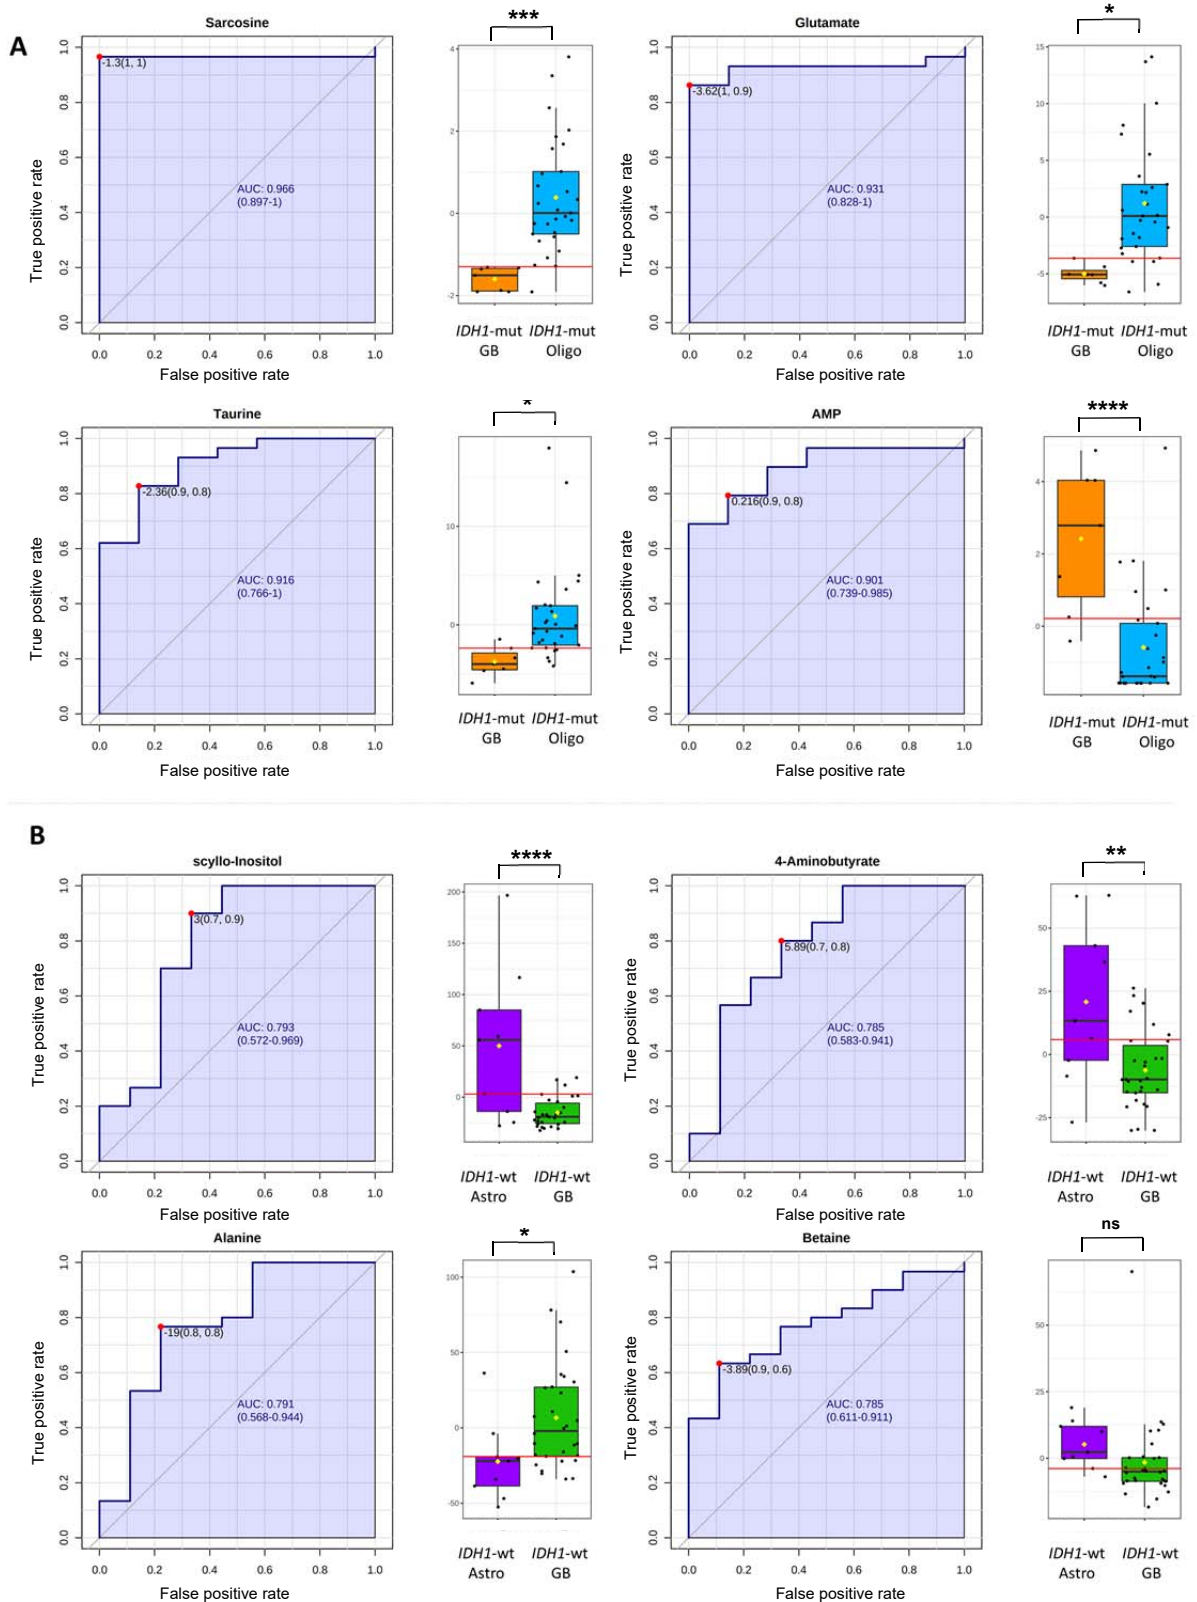

**Supplementary Figure S3: Comparisons of tumor entities by receiver operating characteristic ROC analysis and significant metabolites. (A)** GB *IDH1*-mut (n = 7) vs. Oligo *IDH1*-mut (n = 29), comparison VI, and **(B)** Astro *IDH1*-wt (n = 9) vs. GB *IDH1*-wt (n = 30) comparison VII. *p*-values determined by student's t-tests. Illustrated as box and whiskers plots showing all points with mean, min/max and outliers. Abbreviations: Astro, astrocytoma; GB, glioblastoma; Oligo, oligodendroglioma. *p*-values: \*\*\*\* < 0.0001, \*\*\* < 0.001, \*\* < 0.01, \* < 0.05.

**A Progression-free survival**

| PFS<br><u>Univariate</u>     | Thresholds<br>(mM) <sup>#</sup> | Median (months)        |                        |
|------------------------------|---------------------------------|------------------------|------------------------|
|                              |                                 | <u>below</u>           | <u>above</u>           |
| 2-Hydroxyglutarate           | -87.44                          | 09, CI 95% 06-12, n=23 | 54, CI 95% 31-60, n=43 |
| Alanine                      | -43.06                          | 56, CI 95% 31-68, n=22 | 14, CI 95% 10-30, n=44 |
| Creatine phosphate           | -20.52                          | 12, CI 95% 06-23, n=24 | 54, CI 95% 30-66, n=42 |
| Homocysteine                 | 40.40                           | 36, CI 95% 16-56, n=58 | 11, CI 95% 03-14, n=08 |
| Isoleucine                   | -3.58                           | 41, CI 95% 23-60, n=45 | 12, CI 95% 06-16, n=21 |
| Leucine                      | 56.06                           | 36, CI 95% 16-56, n=56 | 08, CI 95% 04-12, n=10 |
| Mannitol                     | -48.33                          | 54, CI 95% 14-66, n=17 | 16, CI 95% 12-36, n=49 |
| <i>myo</i> -Inositol         | -23.51                          | 14, CI 95% 09-23, n=34 | 60, CI 95% 32-76, n=32 |
| <i>o</i> -Acetylcholine      | 18.75                           | 36, CI 95% 16-56, n=53 | 11, CI 95% 04-16, n=13 |
| <i>scyllo</i> -Inositol      | -80.09                          | 11, CI 95% 06-14, n=20 | 54, CI 95% 31-66, n=46 |
| Serine                       | -61.86                          | 56, CI 95% 14-76, n=11 | 16, CI 95% 12-36, n=55 |
| Threonine                    | 18.95                           | 41, CI 95% 16-60, n=48 | 12, CI 95% 06-16, n=18 |
| <i>sn</i> -Glycero-3-phosph. | -22.31                          | 42, CI 95% 25-60, n=37 | 12, CI 95% 09-30, n=29 |

**B**Bivariate pathology (*IDH1*-status, pathology)

|                                             |                   |      |
|---------------------------------------------|-------------------|------|
| Group 1 <i>IDH1</i> -wt                     | 09, CI 95% 06-12, | n=27 |
| Group 2 <i>IDH1</i> -mut, astrocytoma       | 54, CI 95% 50-76, | n=17 |
| Group 3 <i>IDH1</i> -mut, oligodendroglioma | 56, CI 95% 25-73, | n=17 |

*IDH1*-mut glioblastoma (n=5) were excluded, because 4 were censored.

Bivariate metabolites (2-Hydroxyglutarate -60,05 and *myo*-Inositol -23,51)

|                                                                        |                   |      |
|------------------------------------------------------------------------|-------------------|------|
| Group 1 (2-Hydroxyglutarate < -60,05)                                  | 10, CI 95% 06-12, | n=31 |
| Group 2 (2-Hydroxyglutarate > -60,05 and < <i>myo</i> -Inositol 23,51) | 31, CI 95% 16-60, | n=13 |
| Group 3 (2-Hydroxyglutarate > -60,05 and > <i>myo</i> -Inositol 23,51) | 68, CI 95% 42-76, | n=22 |

**C Overall survival**

| OS<br><u>Univariate</u>      | Thresholds<br>(mM) <sup>#</sup> | Median (months)          |                          |
|------------------------------|---------------------------------|--------------------------|--------------------------|
|                              |                                 | <u>below</u>             | <u>above</u>             |
| 2-Hydroxyglutarate           | -42.99                          | 30, CI 95% 18-48, n=36   | 103, CI 95% 73-152, n=30 |
| Acetate                      | 33.53                           | 68, CI 95% 35-97, n=58   | 156, CI 95% 72-221, n=8  |
| Alanine                      | -39.59                          | 110, CI 95% 73-152, n=28 | 35, CI 95% 20-95, n=38   |
| Formate                      | 40.51                           | 73, CI 95% 37-103, n=58  | 152, CI 95% 23-175, n=8  |
| Glutamate                    | -32.71                          | 97, CI 95% 68-152, n=33  | 37, CI 95% 19-103, n=33  |
| Glycine                      | -44.75                          | 110, CI 95% 68-156, n=29 | 45, CI 95% 20-83, n=37   |
| Homocysteine                 | -15.84                          | 133, CI 95% 35-133, n=28 | 73, CI 95% 30-103, n=38  |
| Isoleucine                   | -11.02                          | 95, CI 95% 52-110, n=42  | 35, CI 95% 18-open, n=24 |
| Leucine                      | 11.74                           | 95, CI 95% 68-110, n=49  | 23, CI 95% 13-open, n=17 |
| Mannitol                     | 10.74                           | 97, CI 95% 52-110, n=48  | 20, CI 95% 13-83, n=18   |
| <i>myo</i> -Inositol         | -163.2                          | 24, CI 95% 13-97, n=11   | 95, CI 95% 52-110, n=55  |
| Phenylalanine                | -0.08                           | 95, CI 95% 52-110, n=42  | 35, CI 95% 18-open, n=24 |
| Threonine                    | 18.95                           | 95, CI 95% 68-110, n=48  | 39, CI 95% 18-open, n=18 |
| Tyrosine                     | -5.68                           | 97, CI 95% 68-116, n=39  | 31, CI 95% 18-open, n=27 |
| <i>sn</i> -Glycero-3-phosph. | -11.20                          | 37, CI 95% 18-83, n=39   | 110, CI 95% 68-152, n=27 |

**D**Bivariate pathology

|                                             |                     |      |
|---------------------------------------------|---------------------|------|
| Group 1 <i>IDH1</i> -wt                     | 19, CI 95% 15-30,   | n=27 |
| Group 2 <i>IDH1</i> -mut, astrocytoma       | 110, CI 95% 68-116, | n=1  |
| Group 3 <i>IDH1</i> -mut, oligodendroglioma | 110, CI 95% 52-156, | n=17 |

*IDH1*-mut glioblastoma (n=5) were excluded, because all were censored.

Bivariate metabolites (Acetate 33,53 and 2-Hydroxyglutarate -22,4)

|                                                          |                     |      |
|----------------------------------------------------------|---------------------|------|
| Group 1 (Acetate < 33,53 and 2-Hydroxyglutarate < -22,4) | 31, CI 95% 18-133,  | n=37 |
| Group 2 (Acetate < 33,53 and 2-Hydroxyglutarate > -22,4) | 95, CI 95% 68-110,  | n=21 |
| Group 3 (Acetate > 33,53)                                | 156, CI 95% 72-221, | n=8  |

**Supplementary Figure S4: Tissue metabolite correlations with progression free and overall survival.** Overview of metabolites and their univariate thresholds determined by one-step classification and regression tree analysis for optimal dichotomization of patients for progression-free survival (PFS, **A**) and overall survival (OS, **C**); Optimal trichotomization of patients by bivariate analyses of either pathological parameters or metabolites each by two-step classification and regression tree analysis for PFS (**B**) and OS (**D**). #Metabolite concentrations (mM) were normalized and Pareto-scaled for dilution effects. *sn*-Glycero-3-phosph. = *sn*-Glycero-3-phosphocholine.

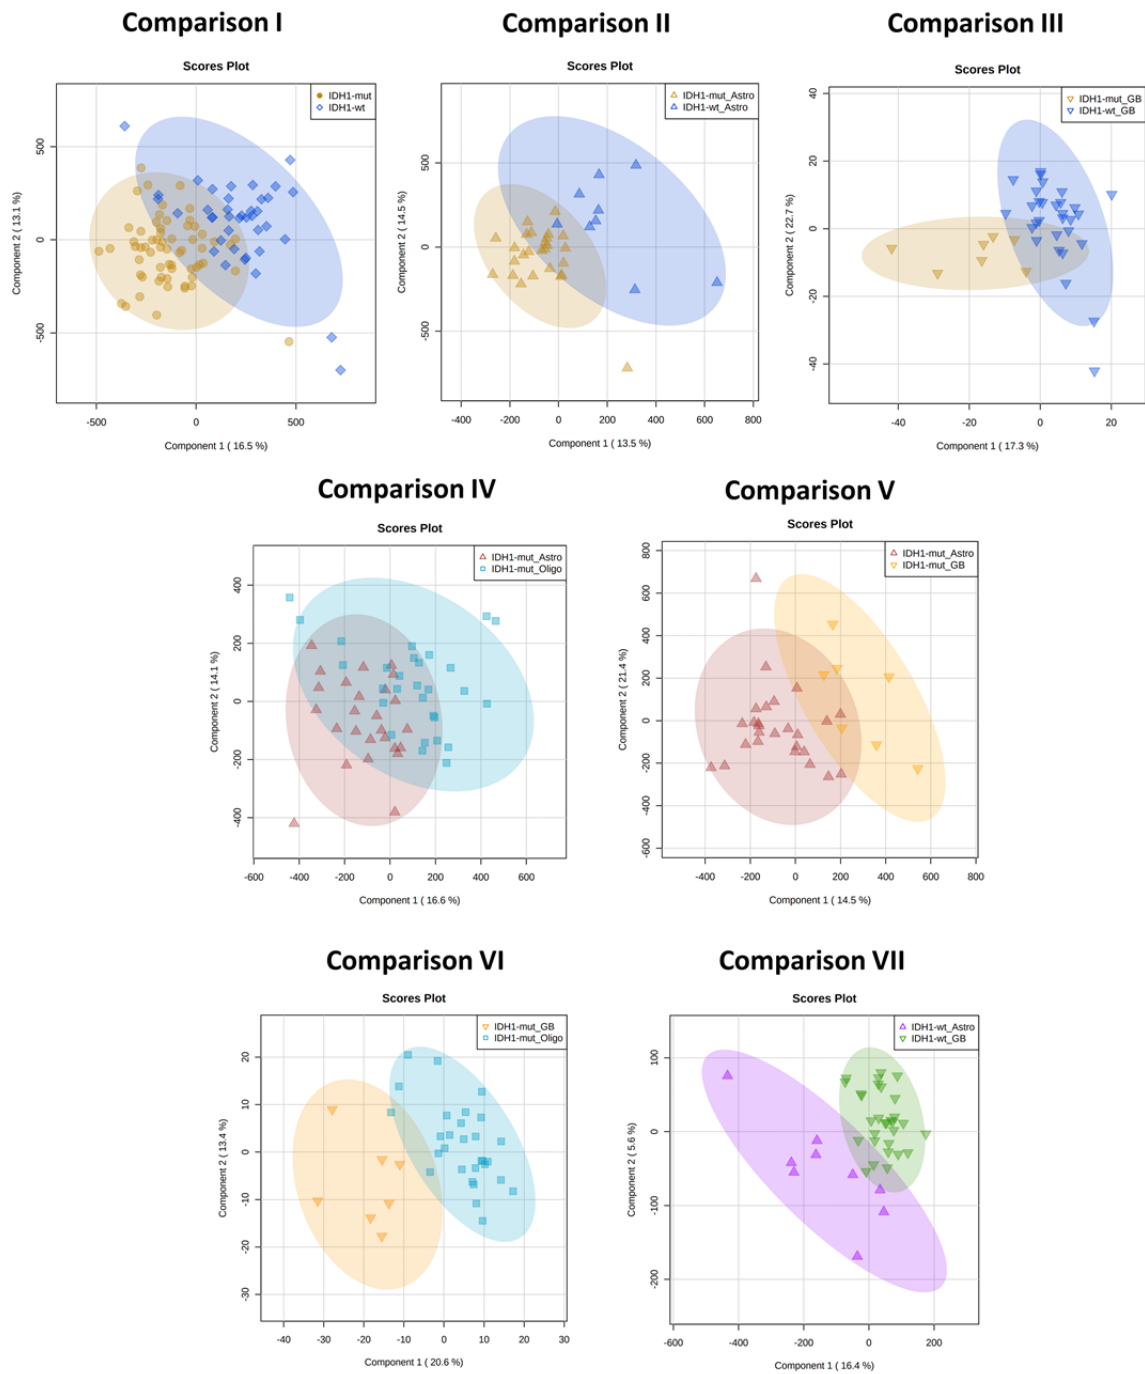

**Supplementary Figure S5: Partial Least Squares Discriminant Analysis (PLSDA) scores plots from the comparisons I – VII.** PLSDA scores plots were integrated in main Figures 2 – 5.

## 2 Supplementary tables

| Comparison I: <i>IDH1</i> -mut (n = 62) vs <i>IDH1</i> -wt (n = 39) |       |          |         | Comparison II: <i>IDH1</i> -mut Astro (n = 26) vs <i>IDH1</i> -wt Astro (n = 9) |       |        |         | Comparison III: <i>IDH1</i> -mut GB (n = 7) vs <i>IDH1</i> -wt GB (n = 30) |       |          |         |
|---------------------------------------------------------------------|-------|----------|---------|---------------------------------------------------------------------------------|-------|--------|---------|----------------------------------------------------------------------------|-------|----------|---------|
| Biomarker                                                           | AUC   | t-test   | log FC2 | Biomarker                                                                       | AUC   | t-test | log FC2 | Biomarker                                                                  | AUC   | t-test   | log FC2 |
| 2-Hydroxyglutarate                                                  | 0.923 | 8.95E-10 | 6.59    | 2-Hydroxyglutarate                                                              | 0.880 | 0.003  | 3.47    | Glutamate                                                                  | 0.990 | 7.30E-05 | -3.55   |
| sn-Glycero-3-phosphocholine                                         | 0.895 | 5.95E-11 | 2.96    | Cystathionine                                                                   | 0.876 | 0.052  | 3.72    | myo-Inositol                                                               | 0.924 | 4.25E-06 | -0.43   |
| scyllo-Inositol                                                     | 0.833 | 8.97E-04 | 2.96    | sn-Glycero-3-phosphocholine                                                     | 0.838 | 0.001  | 1.36    | sn-Glycero-3-phosphocholine                                                | 0.905 | 1.32E-06 | -0.62   |
| Alanine                                                             | 0.804 | 6.77E-07 | 0.37    | Betaine                                                                         | 0.782 | 0.007  | -0.88   | scyllo-Inositol                                                            | 0.876 | 5.57E-04 | -1.03   |
| myo-Inositol                                                        | 0.770 | 0.020    | 2.57    | Histamine                                                                       | 0.774 | 0.074  | 1.35    | Hypotaurine                                                                | 0.848 | 0.062    | -4.80   |
| Hypotaurine                                                         | 0.758 | 7.30E-05 | -0.34   | 2-Hydroxybutyrate                                                               | 0.752 | 0.065  | 0.99    | Citrate                                                                    | 0.805 | 0.061    | -3.51   |
| Sarcosine                                                           | 0.729 | 0.002    | 3.47    | Valine                                                                          | 0.735 | 0.438  | 0.75    | AMP                                                                        | 0.800 | 0.012    | 2.02    |
| Cystathionine                                                       | 0.698 | 0.004    | 4.24    | Hypoxanthine                                                                    | 0.701 | 0.021  | -0.96   | Formate                                                                    | 0.786 | 0.081    | -3.34   |
| Glutathione                                                         | 0.693 | 2.72E-04 | 1.39    | ADP                                                                             | 0.697 | 0.177  | 2.29    | Creatine                                                                   | 0.779 | 0.008    | -1.46   |
| Mannitol                                                            | 0.691 | 5.25E-04 | 0.78    | O-Phosphocholine                                                                | 0.692 | 0.082  | -0.59   | Alanine                                                                    | 0.776 | 0.038    | -3.25   |
| O-Acetylcholine                                                     | 0.689 | 0.002    | 0.81    | Leucine                                                                         | 0.688 | 0.900  | 0.42    | Inosine                                                                    | 0.776 | 0.047    | -3.49   |
| Serine                                                              | 0.686 | 7.96E-04 | 0.82    | Hypotaurine                                                                     | 0.684 | 0.033  | -0.68   | Taurine                                                                    | 0.774 | 0.030    | -3.46   |
| O-Phosphocholine                                                    | 0.683 | 0.011    | 0.87    | O-Acetylcholine                                                                 | 0.679 | 0.048  | -0.44   | Acetate                                                                    | 0.767 | 0.195    | -2.98   |
| Creatine phosphate                                                  | 0.678 | 0.333    | 2.30    | Glutamate                                                                       | 0.671 | 0.174  | -0.29   | Guanosine                                                                  | 0.745 | 0.101    | -3.10   |
| Succinate                                                           | 0.665 | 0.008    | 0.98    | 4-Aminobutyrate                                                                 | 0.662 | 0.082  | -0.35   | Carnitine                                                                  | 0.717 | 0.048    | -1.43   |
| Threonine                                                           | 0.664 | 0.003    | 1.03    | Homocysteine                                                                    | 0.658 | 0.093  | -0.55   | Glutamine                                                                  | 0.714 | 0.202    | -1.89   |
| Glycine                                                             | 0.658 | 0.004    | 0.87    | Serine                                                                          | 0.654 | 0.040  | -0.52   | Fumarate                                                                   | 0.712 | 0.056    | -3.20   |
| Creatine                                                            | 0.658 | 0.036    | 1.88    | Ascorbate                                                                       | 0.645 | 0.044  | -0.32   | Hypoxanthine                                                               | 0.700 | 0.166    | -3.04   |
| Glutamate                                                           | 0.653 | 0.040    | 1.01    | Phenylalanine                                                                   | 0.645 | 0.853  | 0.49    | Lactate                                                                    | 0.698 | 0.157    | -1.88   |
| Carnitine                                                           | 0.649 | 0.002    | 1.83    | Histidine                                                                       | 0.641 | 0.283  | 0.63    | O-Phosphocholine                                                           | 0.671 | 0.294    | -2.75   |



|                   |              |              |              |                       |              |              |              |               |       |       |       |
|-------------------|--------------|--------------|--------------|-----------------------|--------------|--------------|--------------|---------------|-------|-------|-------|
| <b>Histamine</b>  | <b>0.649</b> | <b>0.007</b> | <b>2.51</b>  | O-Phosphoethanolamine | 0.637        | 0.430        | -0.08        | Histamine     | 0.657 | 0.190 | -3.34 |
| <b>Aspartate</b>  | <b>0.648</b> | <b>0.033</b> | <b>-0.95</b> | Tyrosine              | 0.632        | 0.972        | 0.39         | Phenylalanine | 0.657 | 0.782 | -1.98 |
| <b>Methionine</b> | <b>0.645</b> | <b>0.035</b> | <b>1.26</b>  | <b>Glutathione</b>    | <b>0.628</b> | <b>0.035</b> | <b>-0.35</b> | Aspartate     | 0.652 | 0.151 | -1.32 |
| Histidine         | 0.643        | 0.143        | 2.43         | Alanine               | 0.628        | 0.188        | -0.13        | Homocysteine  | 0.648 | 0.150 | -2.97 |
| <b>Guanosine</b>  | <b>0.635</b> | <b>0.021</b> | <b>0.66</b>  | Citrate               | 0.620        | 0.276        | 0.44         | Cystathionine | 0.645 | 0.316 | -0.21 |

| Comparison IV: <i>IDH1</i> -mut Astro (n = 26) vs. <i>IDH1</i> -mut Oligo (n = 29) |       |        |         | Comparison V: <i>IDH1</i> -mut GB (n = 7) vs. <i>IDH1</i> -mut Astro (n = 26) |       |          |         | Comparison VI: <i>IDH1</i> -mut GB (n = 7) vs. <i>IDH1</i> -mut Oligo (n = 29) |       |          |         | Comparison VII: <i>IDH1</i> -wt Astro (n = 9) vs. <i>IDH1</i> -wt GB (n = 30) |       |          |         |
|------------------------------------------------------------------------------------|-------|--------|---------|-------------------------------------------------------------------------------|-------|----------|---------|--------------------------------------------------------------------------------|-------|----------|---------|-------------------------------------------------------------------------------|-------|----------|---------|
| Biomarker                                                                          | AUC   | t-test | log FC2 | Biomarker                                                                     | AUC   | t-test   | log FC2 | Biomarker                                                                      | AUC   | t-test   | log FC2 | Biomarker                                                                     | AUC   | t-test   | log FC2 |
| Carnitine                                                                          | 0.786 | 0.001  | -3.95   | Citrate                                                                       | 0.951 | 0.004    | 5.90    | Sarcosine                                                                      | 0.966 | 7.23E-04 | -8.01   | scyllo-Inositol                                                               | 0.785 | 4.86E-05 | 2.89    |
| O-Phospho-ethanolamine                                                             | 0.744 | 0.005  | -1.99   | Histamine                                                                     | 0.901 | 0.008    | 5.74    | Glutamate                                                                      | 0.926 | 0.004    | -6.26   | 4-Amino-butyrate                                                              | 0.778 | 0.001    | 2.88    |
| Ethanolamine                                                                       | 0.728 | 0.032  | -2.37   | Glutathione                                                                   | 0.896 | 2.47E-04 | 2.72    | Taurine                                                                        | 0.906 | 0.020    | -6.94   | Alanine                                                                       | 0.778 | 0.028    | 0.18    |
| scyllo-Inositol                                                                    | 0.707 | 0.021  | -2.12   | Formate                                                                       | 0.879 | 0.015    | 5.06    | AMP                                                                            | 0.892 | 9.62E-05 | 0.83    | Betaine                                                                       | 0.774 | 0.227    | 2.37    |
| Histidine                                                                          | 0.696 | 0.007  | -0.77   | Uridine                                                                       | 0.868 | 0.002    | 5.50    | Uridine                                                                        | 0.892 | 4.16E-04 | -7.83   | Phenylalanine                                                                 | 0.759 | 0.113    | 0.36    |
| Sarcosine                                                                          | 0.695 | 0.014  | -3.00   | AMP                                                                           | 0.863 | 3.46E-04 | -1.31   | Phenylalanine                                                                  | 0.887 | 1.57E-05 | -3.84   | Tyrosine                                                                      | 0.744 | 0.149    | 0.47    |
| Guanosine                                                                          | 0.684 | 0.147  | 0.84    | Acetate                                                                       | 0.857 | 0.062    | 4.80    | Lactate                                                                        | 0.887 | 1.60E-04 | -4.31   | Valine                                                                        | 0.737 | 0.145    | 0.51    |
| GSSG                                                                               | 0.682 | 0.010  | -0.78   | Histidine                                                                     | 0.846 | 0.006    | 5.51    | Glutathione                                                                    | 0.887 | 8.05E-04 | -3.77   | myo-Inositol                                                                  | 0.722 | 7.54E-04 | 2.61    |
| Nicotinurate                                                                       | 0.676 | 0.029  | -0.23   | Glutamate                                                                     | 0.830 | 0.023    | 4.66    | Formate                                                                        | 0.882 | 0.133    | -6.75   | Creatine                                                                      | 0.711 | 0.006    | 2.03    |
| Citrate                                                                            | 0.674 | 0.035  | -0.77   | Taurine                                                                       | 0.819 | 0.003    | 5.18    | Citrate                                                                        | 0.872 | 0.019    | -6.66   | Hypotaurine                                                                   | 0.704 | 0.194    | -0.28   |
| Lactate                                                                            | 0.662 | 0.113  | -1.08   | Butyrate                                                                      | 0.813 | 0.009    | 2.60    | Succinate                                                                      | 0.852 | 0.001    | -4.33   | Histidine                                                                     | 0.704 | 0.273    | 2.82    |
| O-Acetylcholine                                                                    | 0.658 | 0.030  | -1.93   | Lactate                                                                       | 0.791 | 0.019    | 3.23    | Butyrate                                                                       | 0.837 | 0.006    | -4.11   | Hypoxanthine                                                                  | 0.696 | 0.007    | 2.38    |
| Mannitol                                                                           | 0.639 | 0.033  | -0.91   | Serine                                                                        | 0.780 | 0.046    | 3.00    | Histidine                                                                      | 0.818 | 0.063    | -7.10   | Sarcosine                                                                     | 0.696 | 0.040    | 3.30    |
| Acetate                                                                            | 0.634 | 0.954  | -1.02   | O-Acetylcholine                                                               | 0.775 | 0.013    | 2.89    | Tyrosine                                                                       | 0.808 | 3.91E-04 | -4.22   | Ethanolamine                                                                  | 0.685 | 0.797    | 2.76    |
| Glutathione                                                                        | 0.633 | 0.727  | -1.05   | Phenylalanine                                                                 | 0.769 | 0.024    | 2.86    | Mannitol                                                                       | 0.808 | 0.006    | -4.10   | Creatine                                                                      | 0.682 | 0.024    | 2.55    |

|                      |              |              |              |                   |              |              |             |                   |              |                 |              | phosphate        |              |              |             |
|----------------------|--------------|--------------|--------------|-------------------|--------------|--------------|-------------|-------------------|--------------|-----------------|--------------|------------------|--------------|--------------|-------------|
| <b>Taurine</b>       | <b>0.629</b> | <b>0.038</b> | <b>-1.76</b> | <b>Succinate</b>  | <b>0.764</b> | <b>0.025</b> | <b>3.10</b> | Methionine        | 0.803        | 0.120           | -4.40        | Acetate          | 0.682        | 0.102        | 2.06        |
| O-Phosphocholine     | 0.627        | 0.272        | -1.80        | GTP               | 0.764        | 0.064        | 5.34        | <b>Histamine</b>  | <b>0.793</b> | <b>0.020</b>    | <b>-6.55</b> | Cystathionine    | 0.678        | 0.060        | -0.11       |
| myo-Inositol         | 0.621        | 0.160        | -0.93        | 4-Aminobutyrate   | 0.758        | 0.070        | 4.78        | scyllo-Inositol   | 0.783        | 0.122           | -6.25        | <b>Ascorbate</b> | <b>0.674</b> | <b>0.028</b> | <b>2.63</b> |
| <b>Phenylalanine</b> | <b>0.615</b> | <b>0.047</b> | <b>-0.98</b> | N-Acetylaspartate | 0.753        | 0.092        | 5.23        | <b>Isoleucine</b> | <b>0.778</b> | <b>7.36E-04</b> | <b>-3.88</b> | Leucine          | 0.674        | 0.237        | 0.68        |
| GTP                  | 0.614        | 0.112        | -0.25        | Inosine           | 0.742        | 0.070        | 4.86        | <b>Glucose</b>    | <b>0.768</b> | <b>0.033</b>    | <b>-4.17</b> | Isoleucine       | 0.667        | 0.317        | 0.45        |
| 2-Hydroxybutyrate    | 0.614        | 0.133        | -1.01        | <b>Fumarate</b>   | <b>0.736</b> | <b>0.028</b> | <b>4.68</b> | <b>Serine</b>     | <b>0.768</b> | <b>0.039</b>    | <b>-4.54</b> | Glycine          | 0.663        | 0.171        | 0.81        |
| Hypoxanthine         | 0.602        | 0.855        | -0.45        | Methionine        | 0.731        | 0.169        | 2.85        | <b>Fumarate</b>   | <b>0.749</b> | <b>0.046</b>    | <b>-5.88</b> | O-Acetylcholine  | 0.656        | 0.268        | 0.87        |
| 3-Hydroxybutyrate    | 0.597        | 0.927        | -1.60        | Tyrosine          | 0.720        | 0.076        | 3.08        | Carnitine         | 0.739        | 0.074           | -5.93        | Mannitol         | 0.652        | 0.116        | 0.97        |
| Alanine              | 0.595        | 0.311        | -1.57        | Hypoxanthine      | 0.703        | 0.188        | 4.54        | 4-Aminobutyrate   | 0.739        | 0.078           | -6.26        | GTP              | 0.648        | 0.153        | 1.97        |
| Glutamate            | 0.594        | 0.311        | -1.60        | Isoleucine        | 0.703        | 0.311        | 2.96        | <b>Valine</b>     | <b>0.724</b> | <b>0.006</b>    | <b>-4.55</b> | Uridine          | 0.648        | 0.732        | 2.19        |

**Supplementary table ST1: Top 25 AUC details for univariate ROC biomarker analysis of comparisons I-III in the “*IDH1* mutation status cohort”, and comparisons IV - VII for different histologies and identical *IDH1* status in the “*IDH1* mutation status cohort”.** Abbreviations: AMP, adenosine monophosphate; Astro, astrocytoma; AUC, area under curve; Dex, dexamethasone; FC, fold change; GB, glioblastoma; GTP, guanosine triphosphate; GSSG, glutathione disulfide; Oligo, oligodendroglioma; ROC, receiver operator characteristics; Explanations: Bold are biomarkers with  $p < 0.05$ ; Highlighted in grey are biomarkers shown and discussed in the manuscript and correlated with gene expression data.

**Supplementary Table ST2: Basic clinical characteristics of study population**

| ID   | IDH1 status | Treatment prior to tissue acquisition | Histo | WHO | Age (years) | Resection | PFS (months)   | OS (months)    |
|------|-------------|---------------------------------------|-------|-----|-------------|-----------|----------------|----------------|
| 1201 | IDH1-wt     | Untreated                             | GB    | IV  | 50          | 1         | 12             | 18             |
| 1202 | IDH1-wt     | Untreated                             | GB    | IV  | 78          | 1         | 13             | 19             |
| 1203 | IDH1-wt     | Untreated                             | GB    | IV  | 65          | 1         | 3              | 13             |
| 1204 | IDH1-wt     | Untreated                             | GB    | IV  | 49          | 1         | 11             | no information |
| 1205 | IDH1-wt     | Untreated                             | GB    | IV  | 45          | 1         | 6              | 10             |
| 1206 | IDH1-wt     | Untreated                             | GB    | IV  | 70          | 1         | 7              | 15             |
| 1207 | IDH1-wt     | Untreated                             | GB    | IV  | 45          | 1         | 4              | 28             |
| 1208 | IDH1-wt     | Untreated                             | GB    | IV  | 55          | 1         | 11             | 35             |
| 1209 | IDH1-wt     | Untreated                             | GB    | IV  | 70          | 1         | 4              | 12             |
| 1210 | IDH1-wt     | Untreated                             | Astro | III | 49          | 1         | 6              | 18             |
| 1211 | IDH1-wt     | Untreated                             | GB    | IV  | 47          | 1         | 4              | 37             |
| 1214 | IDH1-wt     | Untreated                             | GB    | IV  | 48          | 1         | > 53           | n/a            |
| 1215 | IDH1-wt     | Untreated                             | GB    | IV  | 58          | 1         | 14             | 20             |
| 1218 | IDH1-wt     | Untreated                             | GB    | IV  | 71          | 1         | 4              | 12             |
| 1219 | IDH1-wt     | Untreated                             | GB    | IV  | 72          | 1         | 12             | no information |
| 1220 | IDH1-wt     | Untreated                             | GB    | IV  | 80          | 1         | 6              | 13             |
| 1221 | IDH1-wt     | Untreated                             | Astro | II  | 37          | 1         | no information | no information |
| 1222 | IDH1-wt     | Untreated                             | GB    | IV  | 77          | 1         | no information | no information |
| 1224 | IDH1-wt     | Untreated                             | GB    | IV  | 70          | 1         | 6              | 13             |
| 1225 | IDH1-wt     | Untreated                             | GB    | IV  | 71          | 1         | no information | no information |
| 1226 | IDH1-wt     | Untreated                             | Astro | II  | 40          | 1         | > 36           | n/a            |
| 1227 | IDH1-wt     | Untreated                             | GB    | IV  | 50          | 1         | 16             | 31             |
| 1228 | IDH1-wt     | Untreated                             | GB    | IV  | 77          | 1         | no information | no information |
| 1401 | IDH1-mut    | Untreated                             | GB    | IV  | 33          | 1         | 56             | n/a            |
| 1402 | IDH1-mut    | Untreated                             | GB    | IV  | 34          | 1         | > 56           | n/a            |
| 1403 | IDH1-mut    | Untreated                             | GB    | IV  | 40          | 1         | > 55           | n/a            |
| 1404 | IDH1-mut    | Untreated                             | Astro | III | 40          | 1         | > 52           | n/a            |
| 1405 | IDH1-mut    | Untreated                             | Astro | III | 45          | 1         | 36             | > 57           |
| 1406 | IDH1-mut    | Untreated                             | Astro | III | 32          | 1         | > 60           | n/a            |
| 1407 | IDH1-mut    | Untreated                             | GB    | IV  | 37          | 1         | 31             | > 63           |
| 1408 | IDH1-mut    | Untreated                             | Oligo | II  | 56          | 1         | 11             | > 27           |
| 1409 | IDH1-mut    | Untreated                             | GB    | IV  | 48          | 1         | no information | no information |
| 1410 | IDH1-mut    | Untreated                             | GB    | IV  | 34          | 1         | > 48           | no information |
| 1411 | IDH1-mut    | Untreated                             | Astro | III | 34          | 1         | 15             | > 50           |
| 1412 | IDH1-mut    | Untreated                             | Oligo | II  | 71          | 1         | > 52           | n/a            |

|      |                  |                     |       |     |    |   |                |                |
|------|------------------|---------------------|-------|-----|----|---|----------------|----------------|
| 1414 | <i>IDH1</i> -mut | <b>Untreated</b>    | Oligo | II  | 32 | 1 | > 48           | n/a            |
| 1416 | <i>IDH1</i> -mut | <b>Untreated</b>    | Oligo | II  | 57 | 1 | > 39           | n/a            |
| 1417 | <i>IDH1</i> -mut | <b>Untreated</b>    | Astro | II  | 63 | 1 | > 57           | no information |
| 1418 | <i>IDH1</i> -mut | <b>Untreated</b>    | Astro | II  | 45 | 1 | no information | no information |
| 1419 | <i>IDH1</i> -mut | <b>Untreated</b>    | Astro | II  | 36 | 1 | > 40           | n/a            |
| 1420 | <i>IDH1</i> -mut | <b>Untreated</b>    | Astro | II  | 62 | 1 | 41             | > 52           |
| 1424 | <i>IDH1</i> -mut | <b>Untreated</b>    | Astro | II  | 39 | 1 | 76             | > 88           |
| 1427 | <i>IDH1</i> -mut | <b>Untreated</b>    | GB    | IV  | 34 | 1 | no information | no information |
| 1429 | <i>IDH1</i> -mut | <b>Untreated</b>    | Oligo | II  | 47 | 1 | > 36           | n/a            |
| 1430 | <i>IDH1</i> -mut | <b>Untreated</b>    | Astro | III | 28 | 1 | 15             | no information |
| 2726 | <i>IDH1</i> -mut | <b>Untreated</b>    | Oligo | III | 43 | 1 | 25             | 156            |
| 3088 | <i>IDH1</i> -mut | <b>Untreated</b>    | Oligo | III | 45 | 2 | 25             | 156            |
| 1506 | <i>IDH1</i> -mut | <b>Untreated</b>    | Oligo | II  | 66 | 1 | 73             | 103            |
| 2686 | <i>IDH1</i> -mut | <b>Untreated</b>    | Oligo | III | 71 | 2 | 73             | 103            |
| 5096 | <i>IDH1</i> -mut | <b>Untreated</b>    | Oligo | II  | 45 | 1 | 32             | 48             |
| 5939 | <i>IDH1</i> -mut | <b>Untreated</b>    | Oligo | III | 48 | 2 | 32             | 48             |
| 2287 | <i>IDH1</i> -mut | <b>Untreated</b>    | Oligo | II  | 29 | 1 | 23             | 175            |
| 2754 | <i>IDH1</i> -mut | <b>Untreated</b>    | Oligo | III | 31 | 2 | 23             | 175            |
| 3509 | <i>IDH1</i> -mut | <b>Untreated</b>    | Astro | II  | 37 | 1 | 31             | 83             |
| 4133 | <i>IDH1</i> -mut | <b>Untreated</b>    | Astro | III | 39 | 2 | 31             | 83             |
| 5120 | <i>IDH1</i> -mut | <b>Untreated</b>    | Astro | II  | 22 | 1 | 13             | 45             |
| 5475 | <i>IDH1</i> -mut | <b>Untreated</b>    | Astro | III | 23 | 2 | 13             | 45             |
| T01  | <i>IDH1</i> -mut | <b>Untreated</b>    | Astro | II  | 39 | 1 | 76             | > 86           |
| T02  | <i>IDH1</i> -mut | <b>Untreated</b>    | Astro | II  | 39 | 2 | 76             | > 84           |
| T05  | <i>IDH1</i> -wt  | <b>Untreated</b>    | Astro | III | 45 | 1 | 35             | > 51           |
| T06  | <i>IDH1</i> -wt  | <b>Untreated</b>    | Astro | III | 45 | 2 | no information | no information |
| 1534 | <i>IDH1</i> -wt  | <b>RT</b>           | Astro | III | 51 | 1 | 14             | 18             |
| 1774 | <i>IDH1</i> -wt  | <b>RT</b>           | Astro | III | 52 | 2 | 14             | 18             |
| 2252 | <i>IDH1</i> -wt  | <b>RT -&gt; PCV</b> | Astro | III | 47 | 1 | 16             | 18             |
| 2581 | <i>IDH1</i> -wt  | <b>RT -&gt; PCV</b> | Astro | III | 48 | 2 | 16             | 18             |
| 4589 | <i>IDH1</i> -mut | <b>RT</b>           | Astro | III | 24 | 1 | 42             | 68             |
| 5647 | <i>IDH1</i> -mut | <b>RT</b>           | Astro | III | 37 | 2 | 42             | 68             |
| 3071 | <i>IDH1</i> -mut | <b>RT</b>           | Astro | III | 35 | 1 | 66             | 73             |
| 4218 | <i>IDH1</i> -mut | <b>RT</b>           | Astro | III | 39 | 2 | 66             | 73             |
| 3186 | <i>IDH1</i> -mut | <b>RT</b>           | Astro | III | 29 | 1 | 60             | 116            |
| 4306 | <i>IDH1</i> -mut | <b>RT</b>           | Astro | III | 34 | 2 | 60             | 116            |
| 3648 | <i>IDH1</i> -mut | <b>RT -&gt; TMZ</b> | Astro | III | 36 | 1 | 54             | 110            |

|      |                  |             |       |     |    |   |     |      |
|------|------------------|-------------|-------|-----|----|---|-----|------|
| 4942 | <i>IDH1</i> -mut | RT ->TMZ    | Astro | III | 40 | 2 | 54  | 110  |
| T03  | <i>IDH1</i> -mut | RT -> TMZ   | Astro | III | 39 | 1 | 10  | > 74 |
| T04  | <i>IDH1</i> -mut | RT -> TMZ   | Astro | III | 39 | 2 | 10  | > 72 |
| T07  | <i>IDH1</i> -wt  | RT/TMZ->TMZ | GB    | IV  | 31 | 1 | 9   | 30   |
| T08  | <i>IDH1</i> -wt  | RT/TMZ->TMZ | GB    | IV  | 31 | 2 | 9   | 30   |
| T09  | <i>IDH1</i> -wt  | RT/TMZ->TMZ | GB    | IV  | 39 | 1 | 5   | 39   |
| T10  | <i>IDH1</i> -wt  | RT/TMZ->TMZ | GB    | IV  | 39 | 2 | 5   | 39   |
| T11  | <i>IDH1</i> -wt  | RT/TMZ->TMZ | GB    | IV  | 54 | 1 | 6   | 12   |
| T12  | <i>IDH1</i> -wt  | RT/TMZ->TMZ | GB    | IV  | 54 | 2 | 6   | 12   |
| T13  | <i>IDH1</i> -wt  | RT/TMZ->TMZ | GB    | IV  | 53 | 1 | 9   | 18   |
| T14  | <i>IDH1</i> -wt  | RT/TMZ->TMZ | GB    | IV  | 53 | 2 | 9   | 18   |
| T15  | <i>IDH1</i> -wt  | RT/TMZ->TMZ | GB    | IV  | 50 | 1 | 9   | 20   |
| T16  | <i>IDH1</i> -wt  | RT/TMZ->TMZ | GB    | IV  | 50 | 2 | 9   | 20   |
| 1742 | <i>IDH1</i> -mut | TMZ         | Oligo | III | 36 | 1 | 68  | 152  |
| 2875 | <i>IDH1</i> -mut | TMZ         | Oligo | III | 41 | 2 | 68  | 152  |
| 3663 | <i>IDH1</i> -mut | TMZ         | Oligo | III | 33 | 1 | 54  | 97   |
| 4943 | <i>IDH1</i> -mut | TMZ         | Oligo | III | 38 | 2 | 54  | 97   |
| 3637 | <i>IDH1</i> -mut | TMZ         | Oligo | III | 47 | 1 | 78  | 110  |
| 5446 | <i>IDH1</i> -mut | TMZ         | Oligo | III | 53 | 2 | 78  | 110  |
| 3346 | <i>IDH1</i> -mut | TMZ         | Oligo | III | 31 | 1 | 114 | 133  |
| 5837 | <i>IDH1</i> -mut | TMZ         | Oligo | III | 40 | 2 | 114 | 133  |
| 2396 | <i>IDH1</i> -mut | RT->TMZ     | Oligo | III | 33 | 1 | 30  | 52   |
| 2913 | <i>IDH1</i> -mut | RT->TMZ     | Oligo | III | 35 | 2 | 30  | 52   |
| 1991 | <i>IDH1</i> -mut | RT          | Oligo | III | 58 | 1 | 60  | 95   |
| 2930 | <i>IDH1</i> -mut | RT          | Oligo | III | 63 | 2 | 60  | 95   |
| 5086 | <i>IDH1</i> -mut | RT->PC      | Oligo | III | 57 | 1 | 16  | 23   |
| 5527 | <i>IDH1</i> -mut | RT->PC      | Oligo | III | 58 | 2 | 16  | 23   |
| 2065 | <i>IDH1</i> -mut | RT          | Oligo | III | 36 | 1 | 56  | 221  |
| 2996 | <i>IDH1</i> -mut | RT          | Oligo | III | 40 | 2 | 56  | 221  |

**Supplementary Table ST2: Basic clinical characteristics of study population.** Patients have been characterized by their assigned identity number (ID), *IDH1* mutation status, treatment prior to tissue acquisition, histology and WHO grade (according to WHO classification 2016), age, resection status, PFS and OS. Abbreviations: Astro, Astrocytoma; GB, Glioblastoma; Histo, Histology; ID, Identifier; Oligo, oligodendroglioma; OS, overall survival; PC, procarbazine/lomustine; PCV, procarbazine/lomustine/vincristine; PFS, progression free survival; RT, radiotherapy; TMZ, temozolomide; WHO, World Health Organization; Further details on cohorts are outlined in Figure 1 and in the text.
